# Supplementary material
Source: PubMed Central journal article supplement (PMC7223037)
Supplement: 41415_2020_1452_MOESM1_ESM.pdf [file 41415_2020_1452_MOESM1_ESM.pdf]

Supplementary Table 1  
 Characteristics of the individual studies included in the meta-analysis

RCT

| <i>REFERENCE, YEAR</i>     | <i>COUNTRY</i> | <i>YEAR</i> | <i>STUDY SETTING</i>            | <i>DURATION</i> | <i>N</i>                | <i>INTERVENTION TYPE</i>                                                                                                                                                                                                                                                                                         | <i>CONTROL</i>                                                                                                       | <i>BIAS</i>                                                                                            | <i>FUNDING</i>                                                               |
|----------------------------|----------------|-------------|---------------------------------|-----------------|-------------------------|------------------------------------------------------------------------------------------------------------------------------------------------------------------------------------------------------------------------------------------------------------------------------------------------------------------|----------------------------------------------------------------------------------------------------------------------|--------------------------------------------------------------------------------------------------------|------------------------------------------------------------------------------|
| <b>ADACHI 2002</b>         | Japan          | 2002        | Elderly living in nursing homes | 24 months       | Number evaluated: 88    | Method of oral hygiene treatment focused mainly on <b>mechanical cleaning</b> with scaling with hand scalers once a week by dental hygienists. Routine care consisted of brushing of the teeth with an electric brush with an automatic water supply. Assisted cleaning after each meal by staffs or caregivers. | Caregiver-provided usual oral care<br>Swabbing with a sponge brush and denture cleaning after each meal by residents | <i>RS -unclear, AC- unclear, BP-High risk, OA- unclear, OD- unclear, SR-low risk, OR- low risk.</i>    | Grant from Tokyo Dental College                                              |
| <b>BOURIGAULT 2011</b>     | France         | 2011        | Nursing homes                   | 18 months       | Number evaluated: 2,513 | <b>Bucco dental health care professional care</b> brushing teeth, buccal mucosa and tongue (three times a day and after each meal) + mouthrinse ( <b>chlorhexidine</b> ) + dental visit (annual visit to dentists).                                                                                              | Usual mouth care (not stated in detail)                                                                              | <i>RS -unclear, AC- unclear, BP-High risk, OA- unclear, OD- unclear, SR-low risk, OR- low risk.</i>    | Colgate-Palmolive and the 'Programme Hospitalier de Recherche Clinique' 2003 |
| <b>JUTHANI-MEHTHA 2015</b> | USA            | 2015        | Nursing homes                   | 30 months       | Number evaluated: 575   | Brushing teeth (twice a day) + cleaning denture + mouthrinse (0.12% <b>chlorhexidine</b> oral rinse, twice a day) + upright feeding positioning, by <b>nurses</b>                                                                                                                                                | Usual oral care + usual feeding position (not stated in detail)                                                      | <i>RS -low risk, AC-low risk, BP-High risk, OA- low risk, OD- low risk, SR-low risk, OR- low risk.</i> | National Institutes of Health, USA                                           |

|                        |           |      |                                  |                        |                       |                                                                                                                                                                                                    |                          |                                                                                                     |                                 |
|------------------------|-----------|------|----------------------------------|------------------------|-----------------------|----------------------------------------------------------------------------------------------------------------------------------------------------------------------------------------------------|--------------------------|-----------------------------------------------------------------------------------------------------|---------------------------------|
| <b>LAM 2013</b>        | Hong Kong | 2013 | Stroke rehabilitation unit       | 31 months              | Number evaluated: 81  | Professional OHI with <b>chlorhexidine</b> mouth wash use                                                                                                                                          | Oral hygiene instruction | <i>RS -low, AC- unclear, BP-High risk, OA- unclear, OD- unclear, SR-low risk, OR- low risk.</i>     | Grant from Tokyo Dental College |
| <b>OHSAWA 2003</b>     | Japan     | 2003 | Nursing homes in Japan           | 24 months of follow-up | Number evaluated: 49  | Brushing teeth after each meal assisted by nurses and caregivers along with <b>povidone iodine</b> (1.0%) as mouthwash; mechanical plaque control, 2-3 days/week by dentists or dental hygienists. | Usual oral care          | <i>RS -low, AC- unclear, BP-High risk, OA- low risk, OD- unclear, SR-low risk, OR- low risk.</i>    | Not stated                      |
| <b>PANCHABHAI 2009</b> | India     | 2009 | ICU (mixed medical and surgical) | 8 months               | Number evaluated: 300 | <b>Chlorhexidine</b> along with usual care.                                                                                                                                                        | Potassium permanganate   | <i>RS -unclear, AC- unclear, BP-High risk, OA- low risk, OD- unclear, SR-low risk, OR- unclear.</i> | Not stated                      |
| <b>YONEYAMA 2002</b>   | Japan     | 2002 | Nursing homes in Japan           | 24 months              | Number evaluated: 366 | Brushing teeth after each meal assisted by nurses and caregivers along with <b>povidone iodine</b> (1.0%) as mouthwash; plaque control once a week by dentists and dental hygienists.              | Usual oral care          | <i>RS -low, AC- unclear, BP-High risk, OA- low risk, OD- unclear, SR-low risk, OR- low risk.</i>    | Japan Welfare Ministry          |

Random sequence generation (selection bias) - RS, Allocation concealment (selection bias) – AC, Blinding of participants and personnel (performance bias) All outcomes- BP, Blinding of outcome assessment (detection bias) All outcomes- OA, Incomplete outcome data (attrition bias) All outcomes- OD, Selective reporting (reporting bias) -SR, Other risk-OR.

## Non-RCT & Other studies

| <i>REFERENCE, YEAR</i> | <i>COUNTRY</i> | <i>YEAR</i> | <i>STUDY DESIGN</i> | <i>DURATION</i> | <i>NUMBER OF PARTICIPANTS</i> | <i>INTERVENTION TYPE</i>                                                                                                                                                                                                                                                                                       | <i>CONTROL</i>  | <i>FUNDING</i>                                                                                                 |
|------------------------|----------------|-------------|---------------------|-----------------|-------------------------------|----------------------------------------------------------------------------------------------------------------------------------------------------------------------------------------------------------------------------------------------------------------------------------------------------------------|-----------------|----------------------------------------------------------------------------------------------------------------|
| <b>MCNALLY 2019</b>    | USA            | 2019        | Controlled trial    | 3.5 months      | 2,890                         | Toothbrushing three times per day, each toothbrush was coated with sodium bicarbonate and included a single-use antiseptic oral solution (0.05% <b>cetylpyridinium chloride</b> ).                                                                                                                             | Usual oral care | Supported in part by an unrestricted grant and in-kind donation of oral care products from Sage Products, Inc. |
| <b>HOLLAR 2017</b>     | Netherlands    | 2017        | Controlled trial    | 12 months       | 103                           | Receiving daily oral care and 0.05% <b>chlorhexidine</b>                                                                                                                                                                                                                                                       | Usual oral care | Not stated                                                                                                     |
| <b>BASSIM 2008</b>     | USA            | 2008        | Retrospective       | 79 weeks        | 143                           | This included toothbrushing, antiseptic mouthwash use, and oral and denture cleaning for edentulous or partially edentulous residents.                                                                                                                                                                         | Usual oral care | Dental Research fellowship                                                                                     |
| <b>ROBERTSON 2013</b>  | Canada         | 2013        | Quasi-experiment    | 6 months        | 83                            | Change mouth suction equipment every 24 hours, Mouth assessment every 2-4 hours, Cleanse mouth with toothbrush every 12 hours, Cleanse oral mucosa with oral rinse solution every 2-4 hours, moisturise mouth/lips with swab and standard mouth moisturiser every 4 hours, Suction mouth and throat as needed. | Usual oral care | Not stated                                                                                                     |
